# Supplementary material
Source: PubMed Central journal article supplement (PMC4005608)
Supplement: NIHMS546920-supplement-01.pdf [file NIHMS546920-supplement-01.pdf]

**Supplemental Figure 1. Histology and cell differentiation in *Notch1*<sup>Δ/Δ</sup> embryonic lungs.**

**A.** Overall morphology and H&E-stained sections of *Notch1*<sup>Δ/Δ</sup> and *Notch1*<sup>fl/fl</sup> (control) lungs at two embryonic stages. Panels “a” to “d”, E15.5, & Panels “e” to “h”, E18.5 lungs. **B.** Clara cell differentiation in E18.5 lungs. **C.** NE, ciliated and alveolar type I cell differentiation in E18.5 lungs (Panels “m” to “r”). Expression of SP-C, SP-B and NKX2.1 in E18.5 lungs (Panels “s” to “x”).

**Supplemental Figure 2. Histology and cell differentiation in *Notch1*<sup>Δ/Δ</sup> adult lung.**

H&E staining analysis of *Notch1*<sup>fl/fl</sup> and *Notch1*<sup>Δ/Δ</sup> adult lungs (Panels a & b). Clara and ciliated cell differentiation in *Notch1*<sup>fl/fl</sup> and *Notch1*<sup>Δ/Δ</sup> adult lungs (Panels c & d).

**Supplemental Figure 3. Cell differentiation in *Notch1*<sup>Δ/Δ</sup> embryonic lungs.**

*CC10*, *Foxj1*, *PGP9.5*, *Sp-B*, *Sp-C* and *Nkx2.1* in E18.5 *Notch1*<sup>fl/fl</sup> and *Notch1*<sup>Δ/Δ</sup> lungs were analyzed by real-time PCR.

**Supplemental Figure 4. Colocalization of activated NOTCH1 with markers for Clara or ciliated cells in wild-type E18.5 lungs.**

Immunolocalization of activated NOTCH1 and CC10 (Panel a) or β-tubulin (Panel b) in wild-type E18.5 lungs. Double positive cells (arrow) and single positive cells (triangle).

**Supplemental Figure 5. PGP9.5<sup>positive</sup> cells are not ciliated cells in injured and non-injured lungs.**

Immunolocalization of PGP9.5 and β-tubulin in uninjured lungs (Panels a & c) and lungs after 3 days of naphthalene injury (Panels b & d). PGP9.5<sup>positive</sup> (red, arrow) and β-tubulin<sup>positive</sup> (green, triangle).

**Supplemental Figure 6. Quantification of cell proliferation after Naphthalene injury.**

**A.** Percentage of proliferating cells (Ki67<sup>positive</sup>) on days 2, 3, 5 and 7 post-injury. Oil was used as injury control. **B.** Percent proliferating Clara cells (double Ki67<sup>positive</sup>; CC10<sup>positive</sup> cells) in airways of control and mutant mice. **C.** Percent proliferating PGP9.5<sup>positive</sup> cells (double Phospho-Histone3<sup>positive</sup>; PGP9.5<sup>positive</sup> cells) in the airways of mutant and control mice. Cell numbers were determined by manual counting on multiple random fields (n=10).
