# Supplementary material
Source: PubMed Central journal article supplement (PMC4005608)
Supplement: NIHMS546920-supplement-Supp_Fig_S1-S5.pdf [file NIHMS546920-supplement-Supp_Fig_S1-S5.pdf]

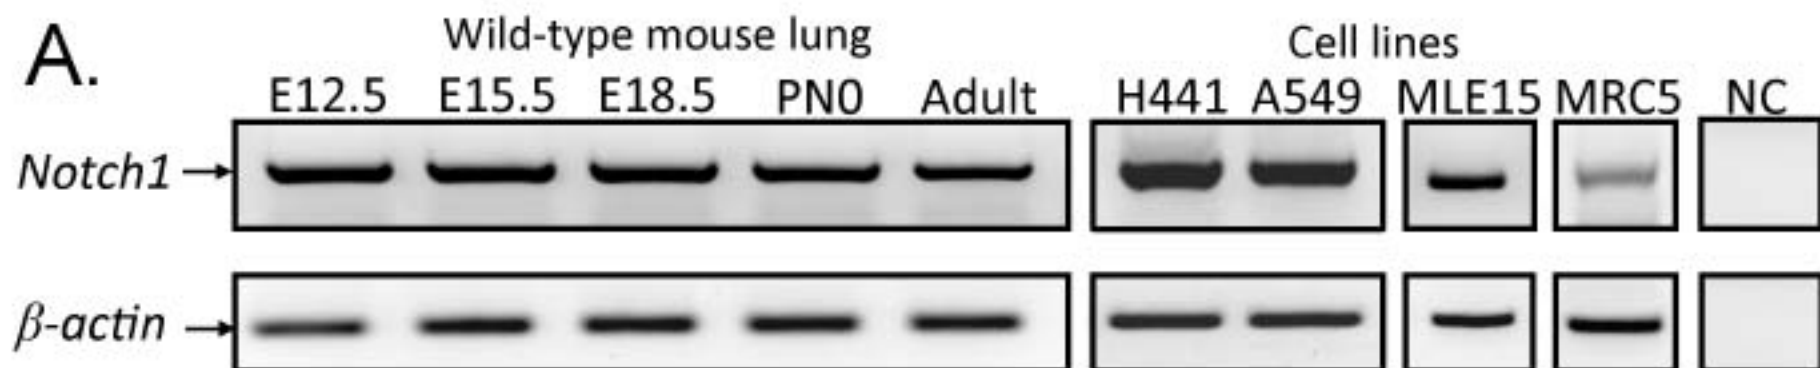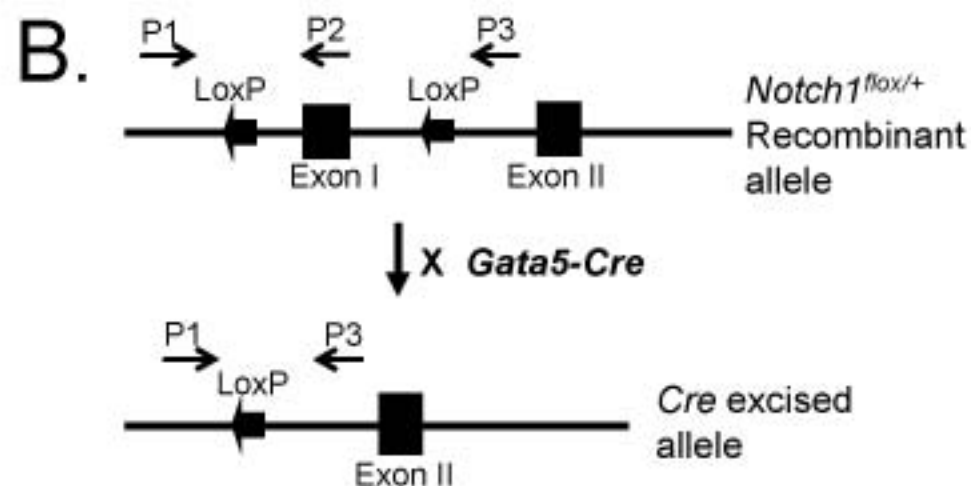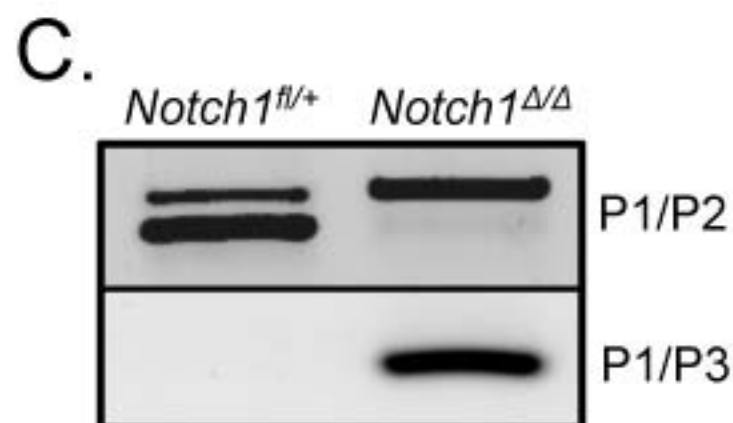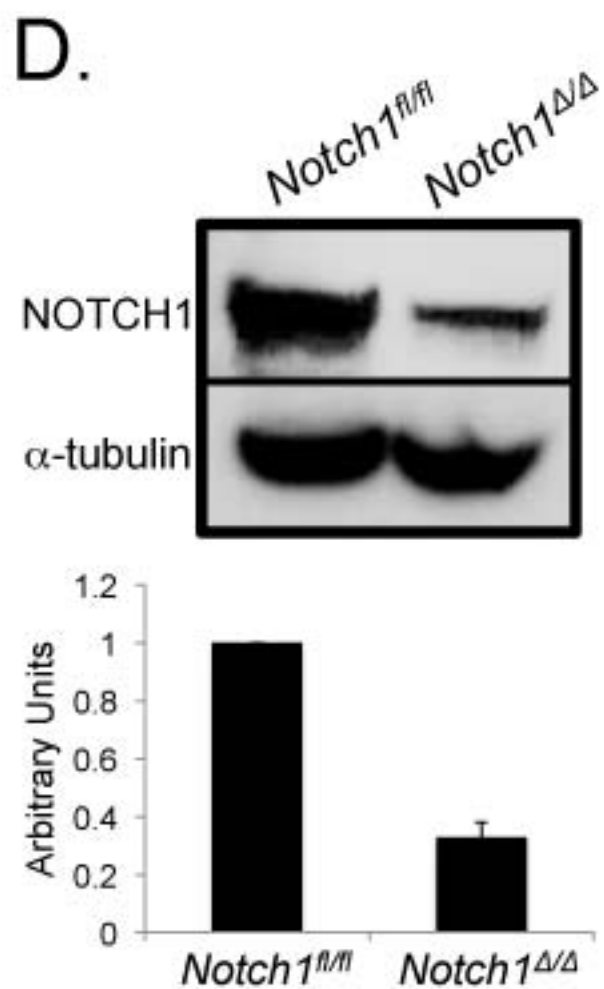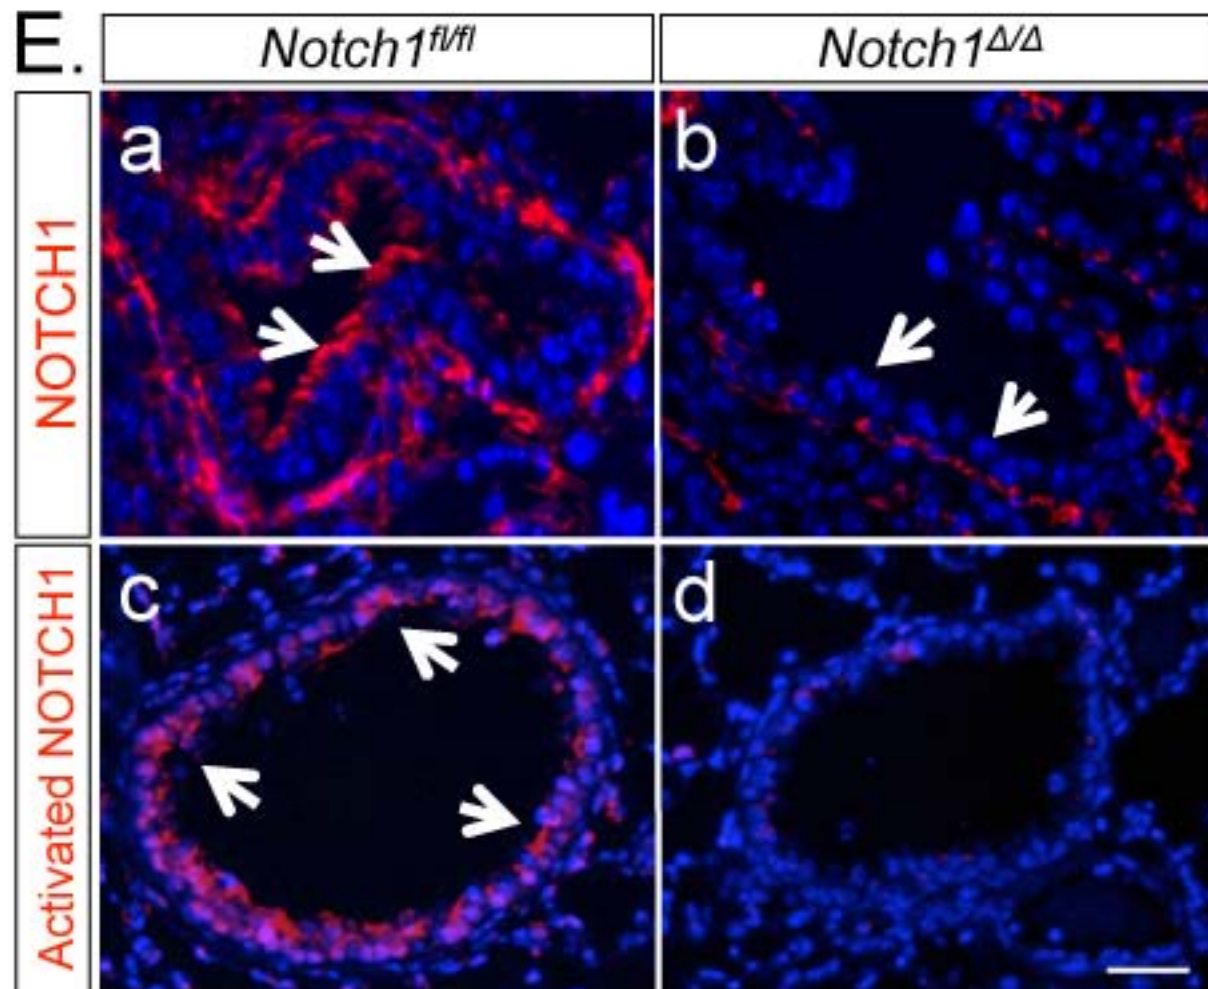

**A.***Notch1<sup>fl/fl</sup>* *Notch1<sup>Δ/Δ</sup>*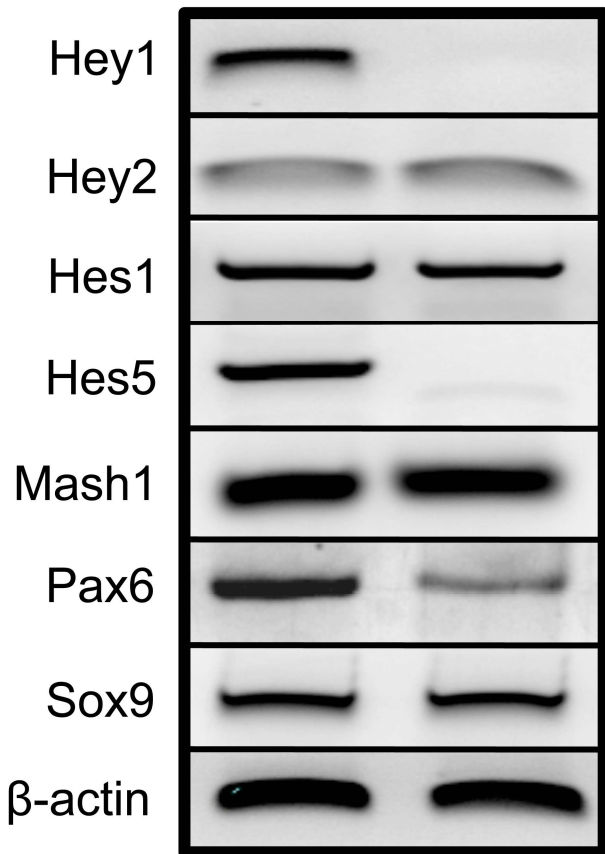**E17****B.***Notch1<sup>fl/fl</sup>* *Notch1<sup>Δ/Δ</sup>*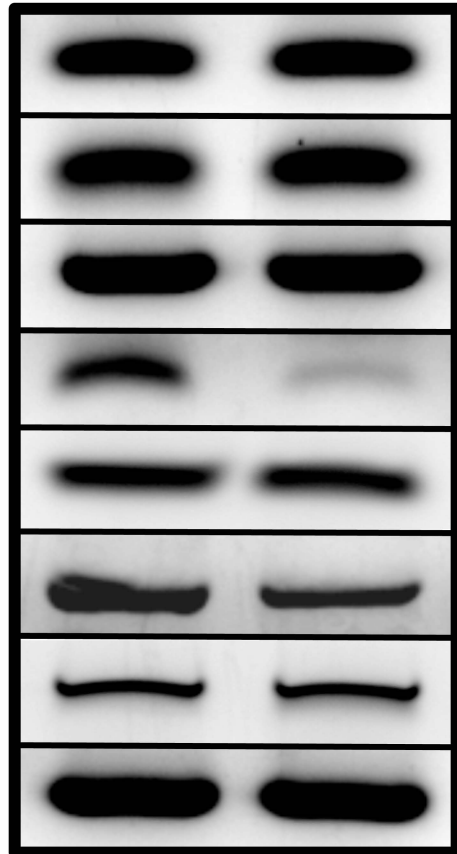**3-month**

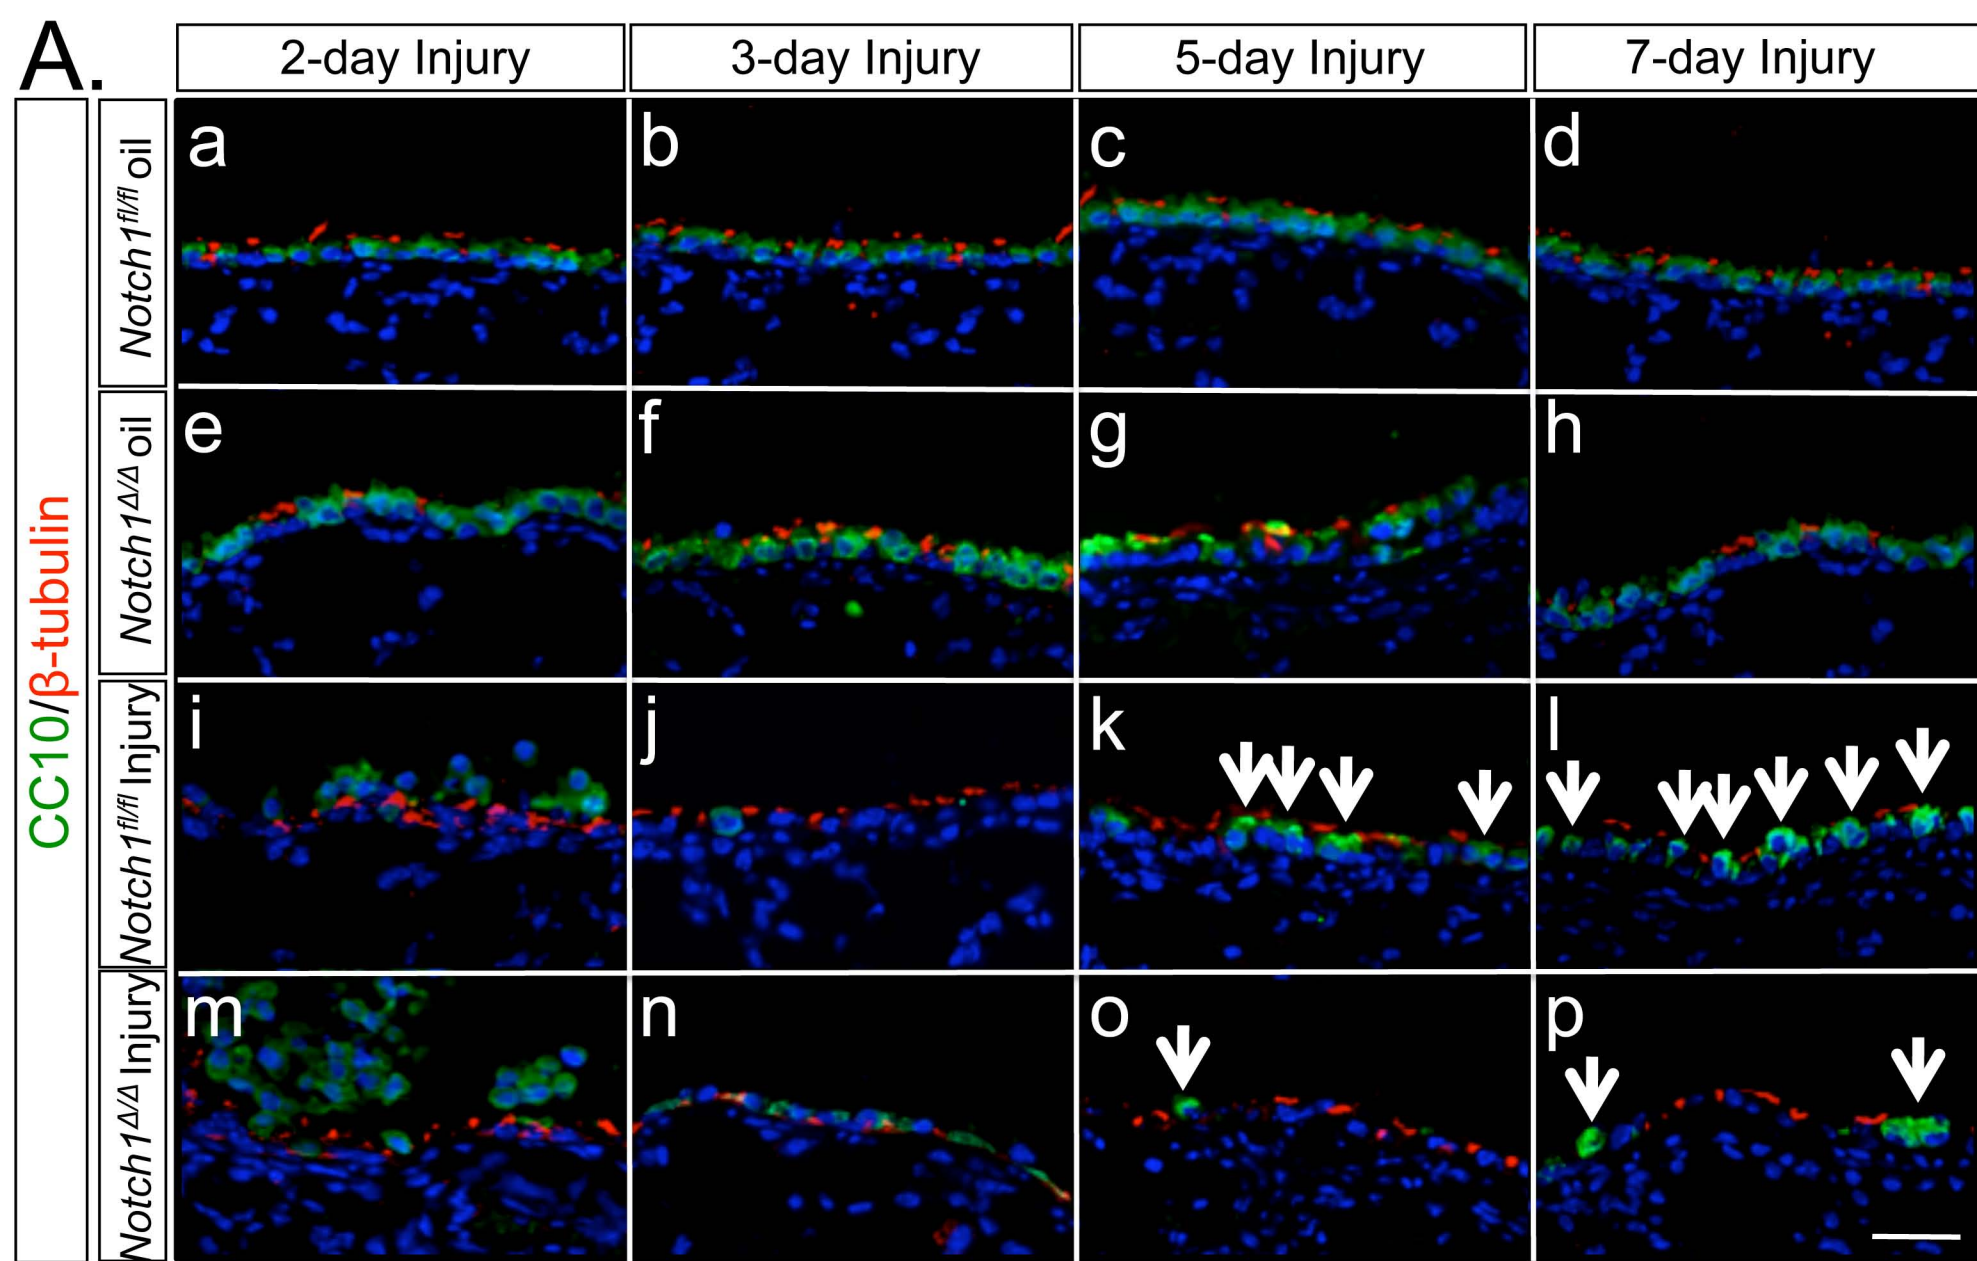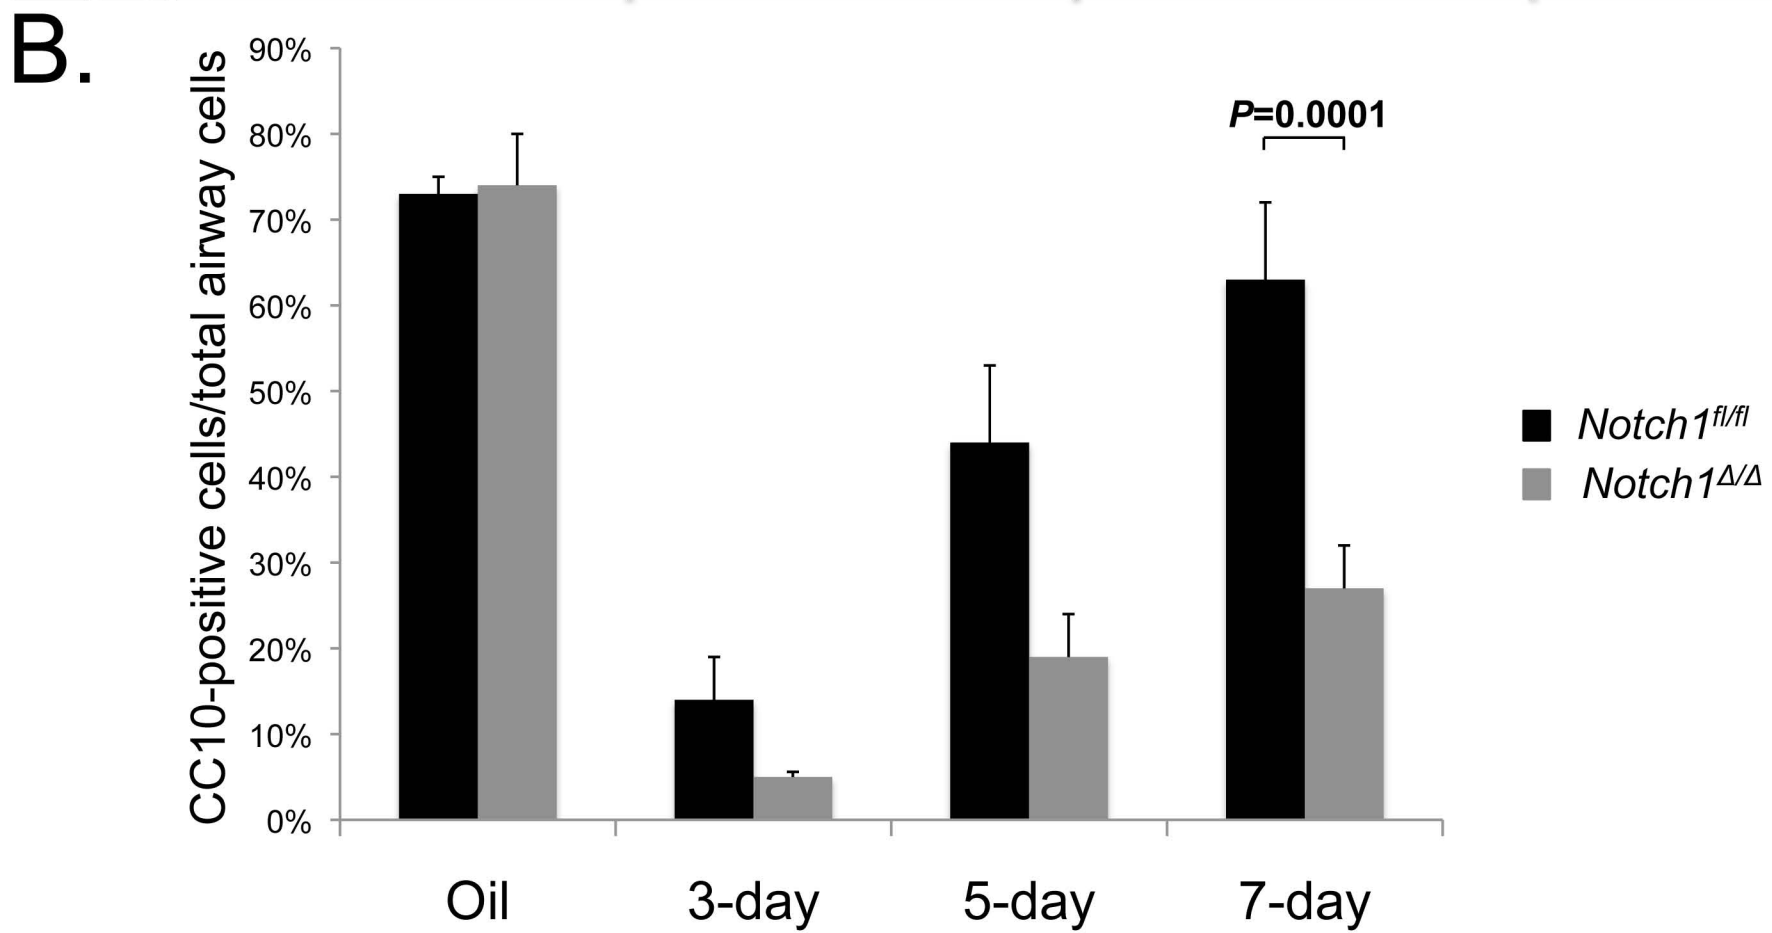

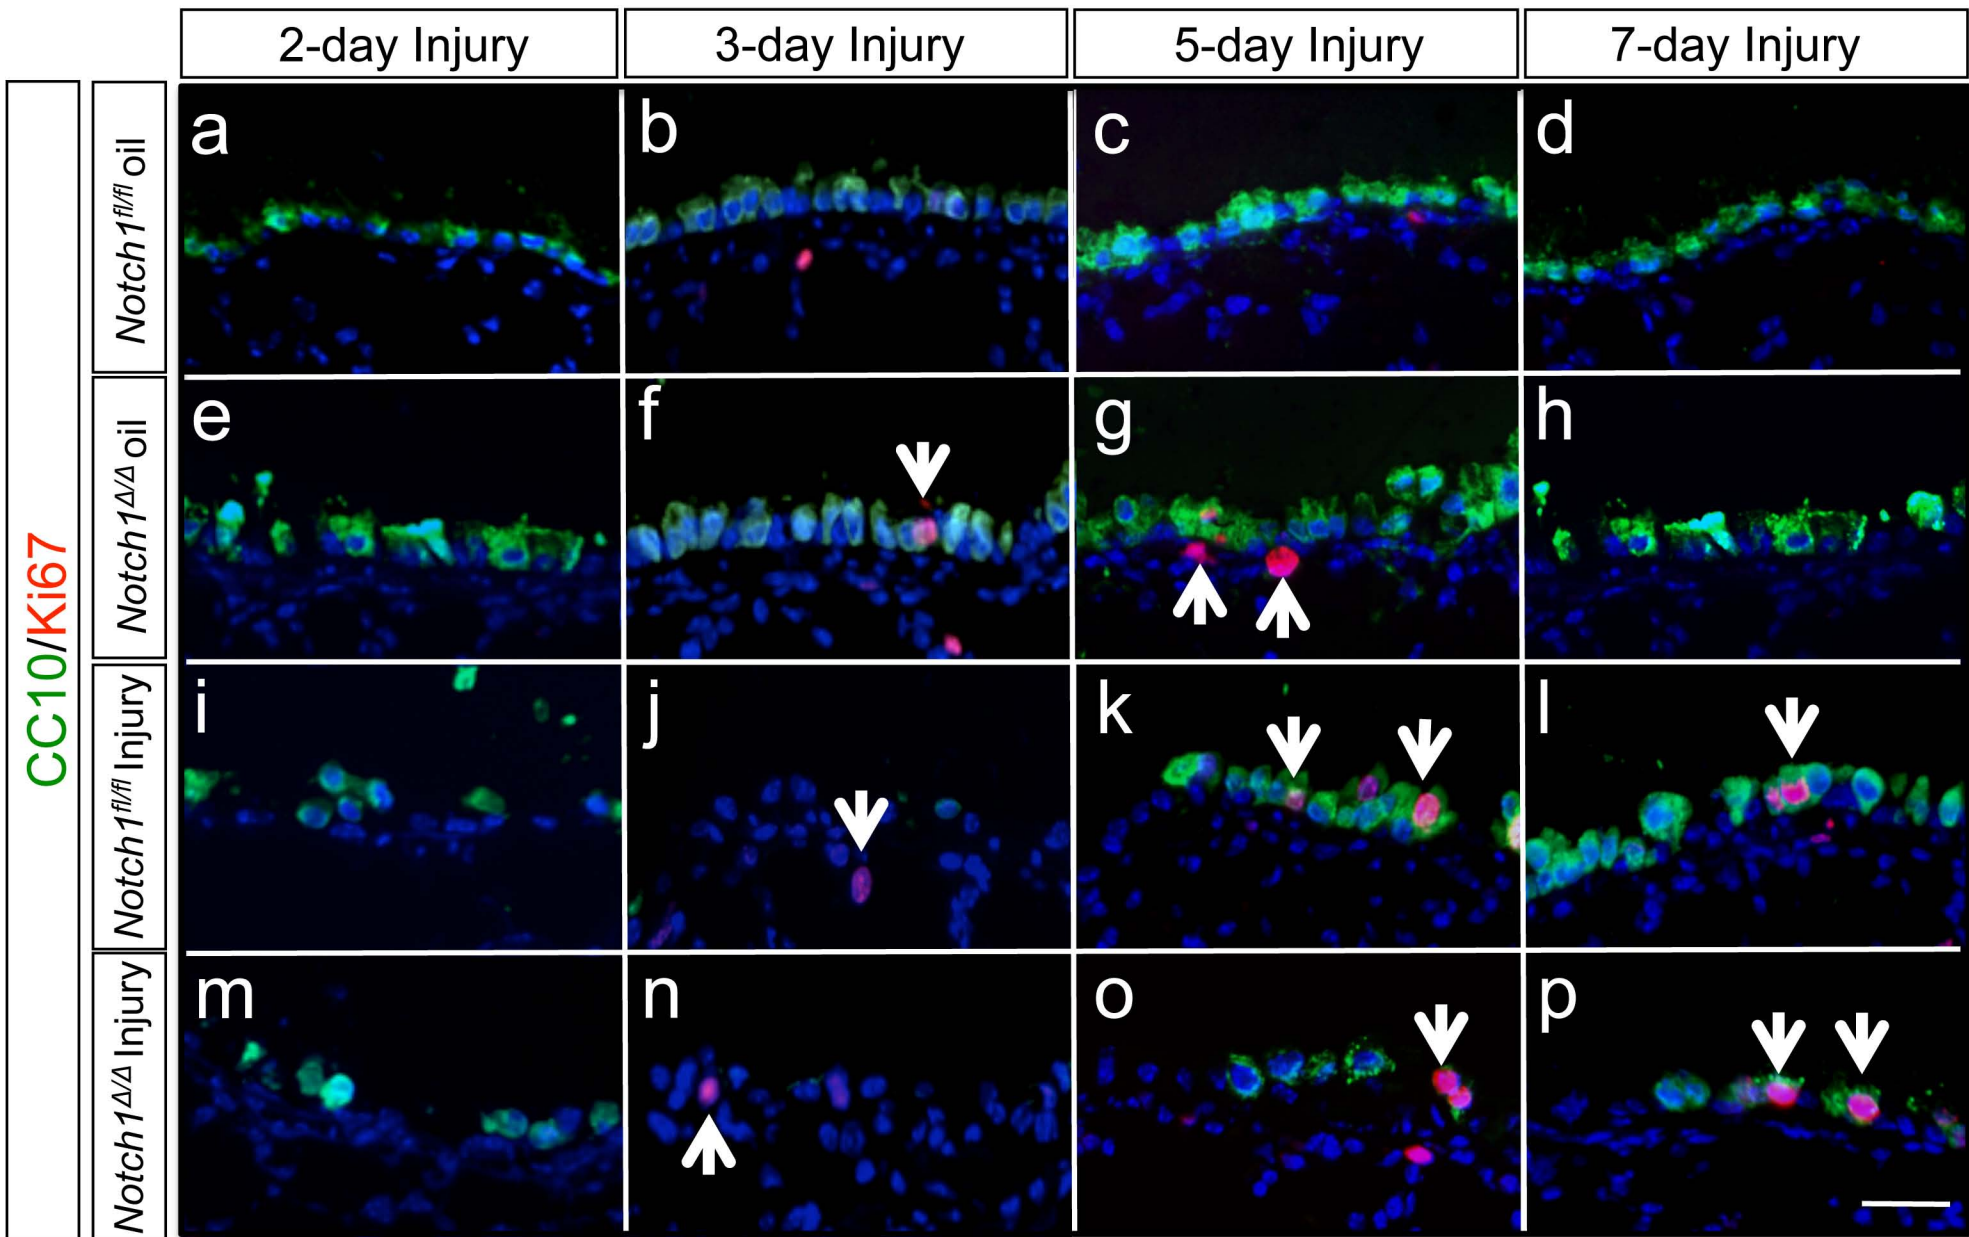

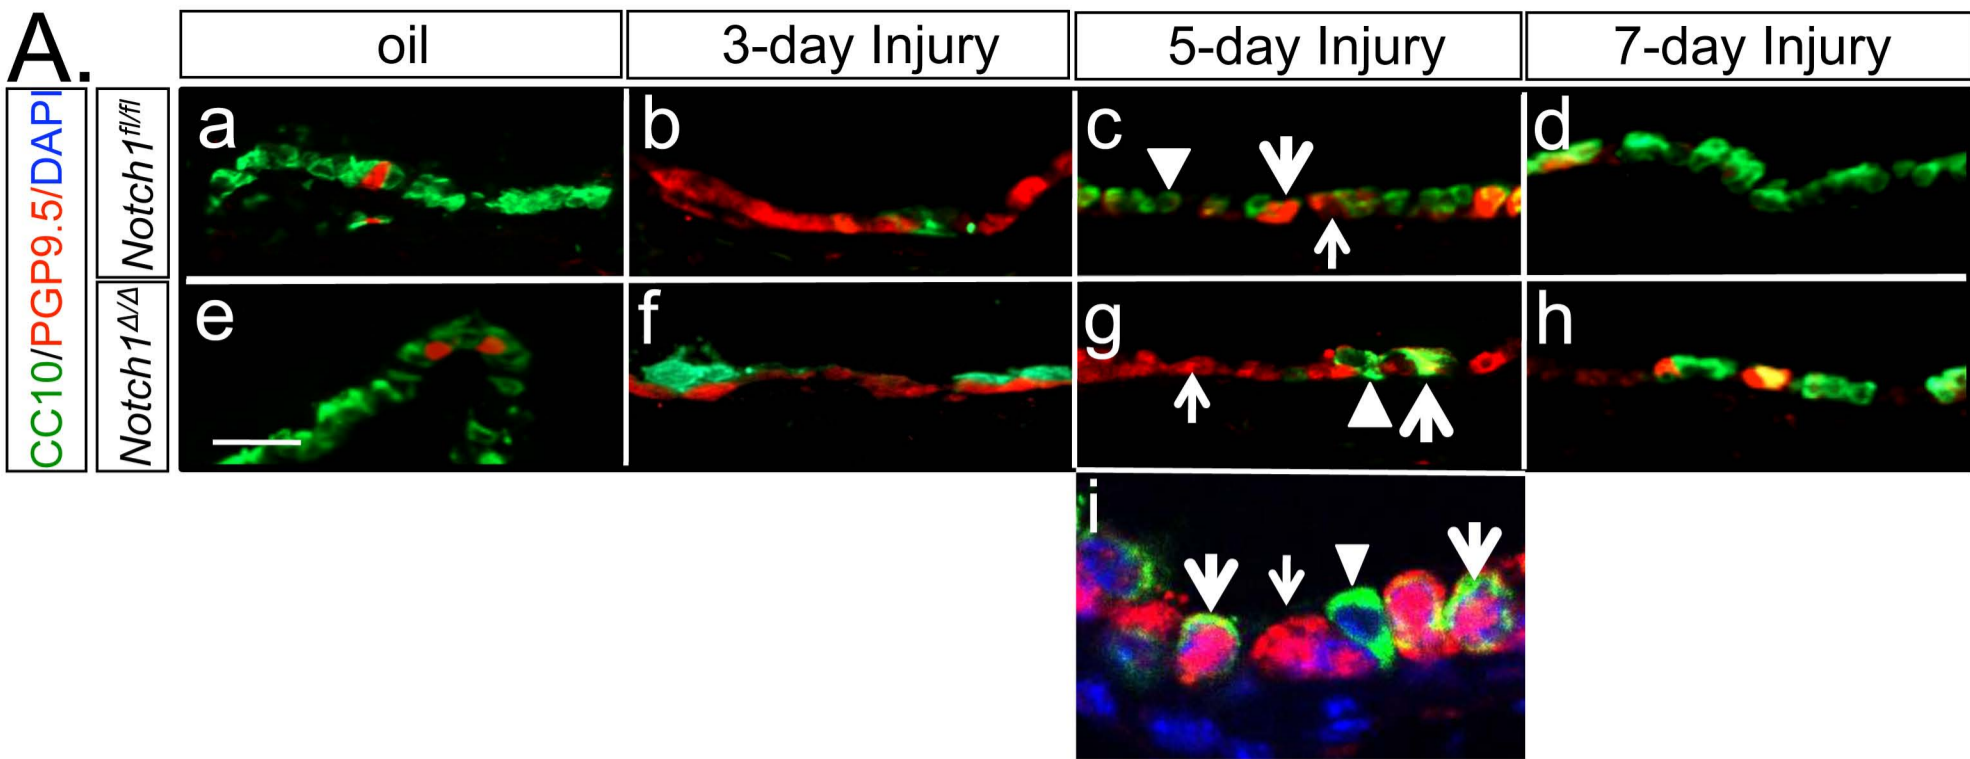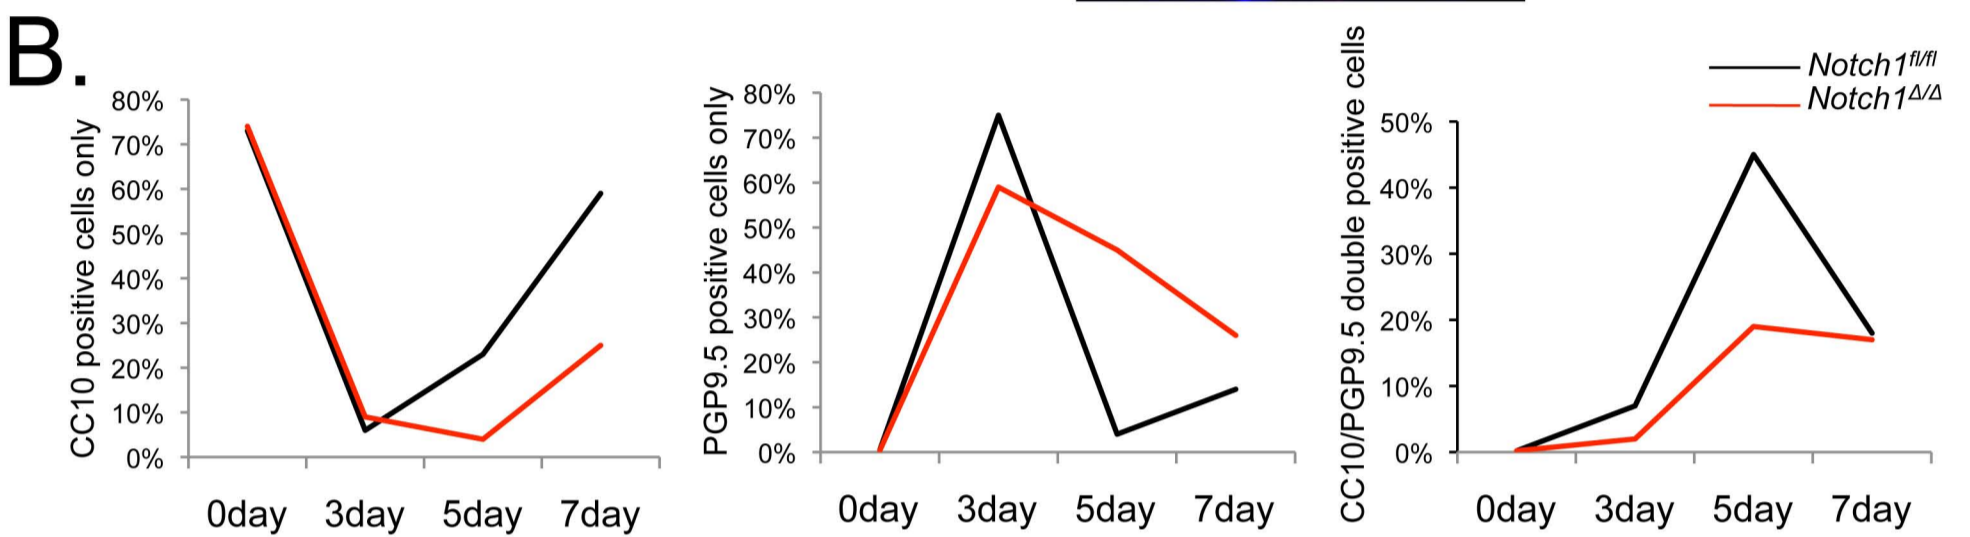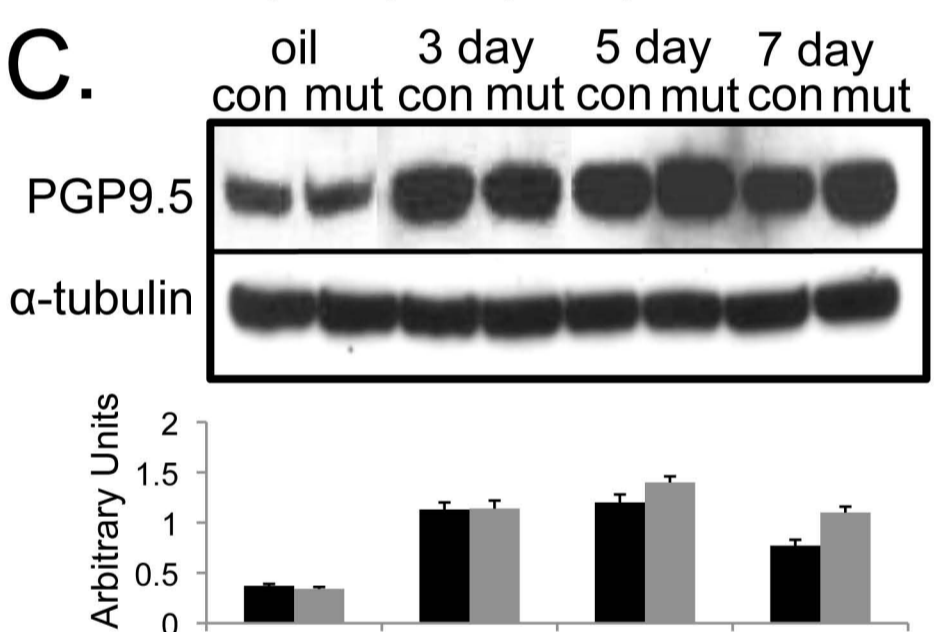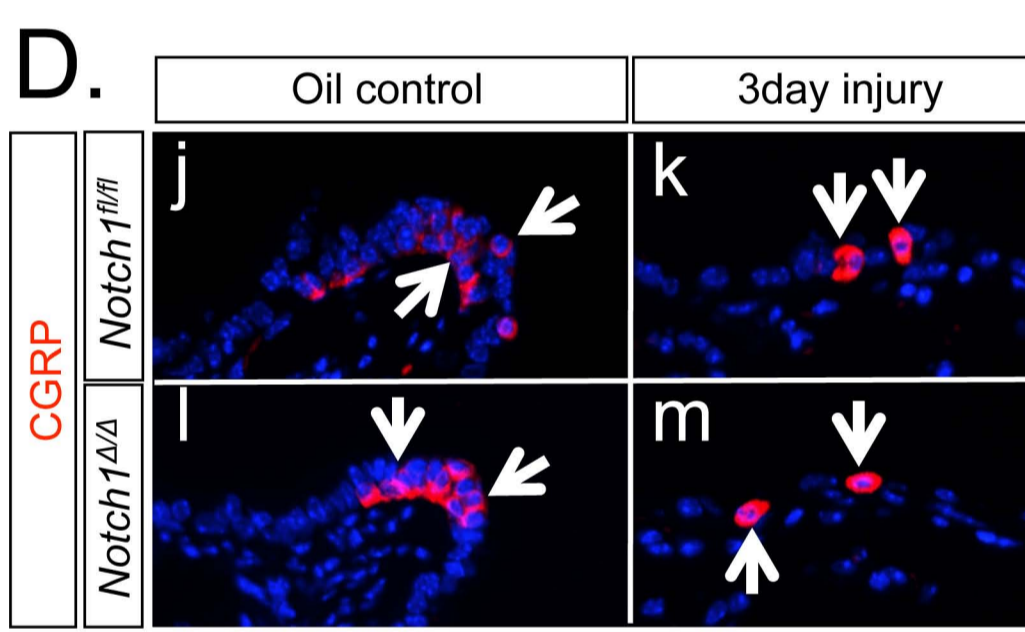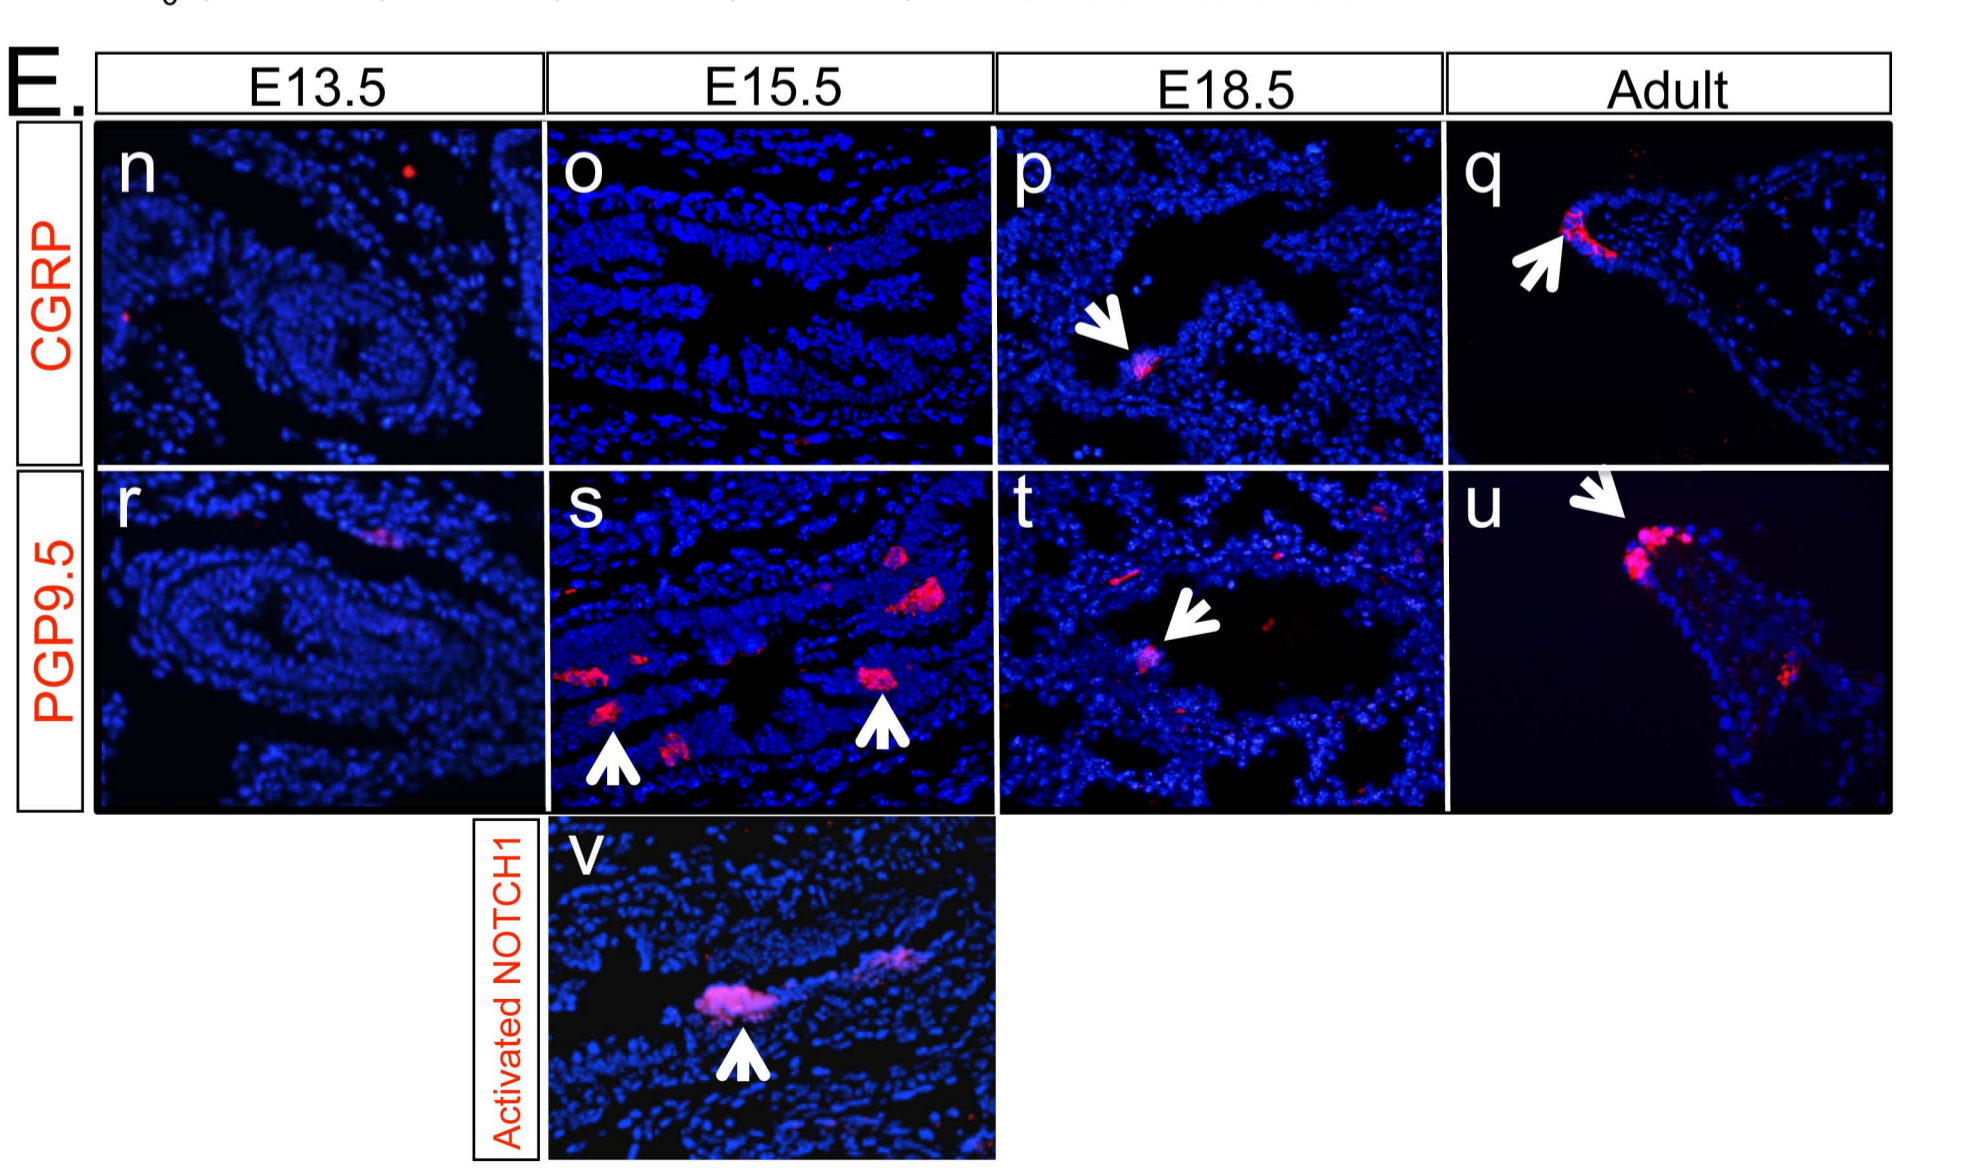

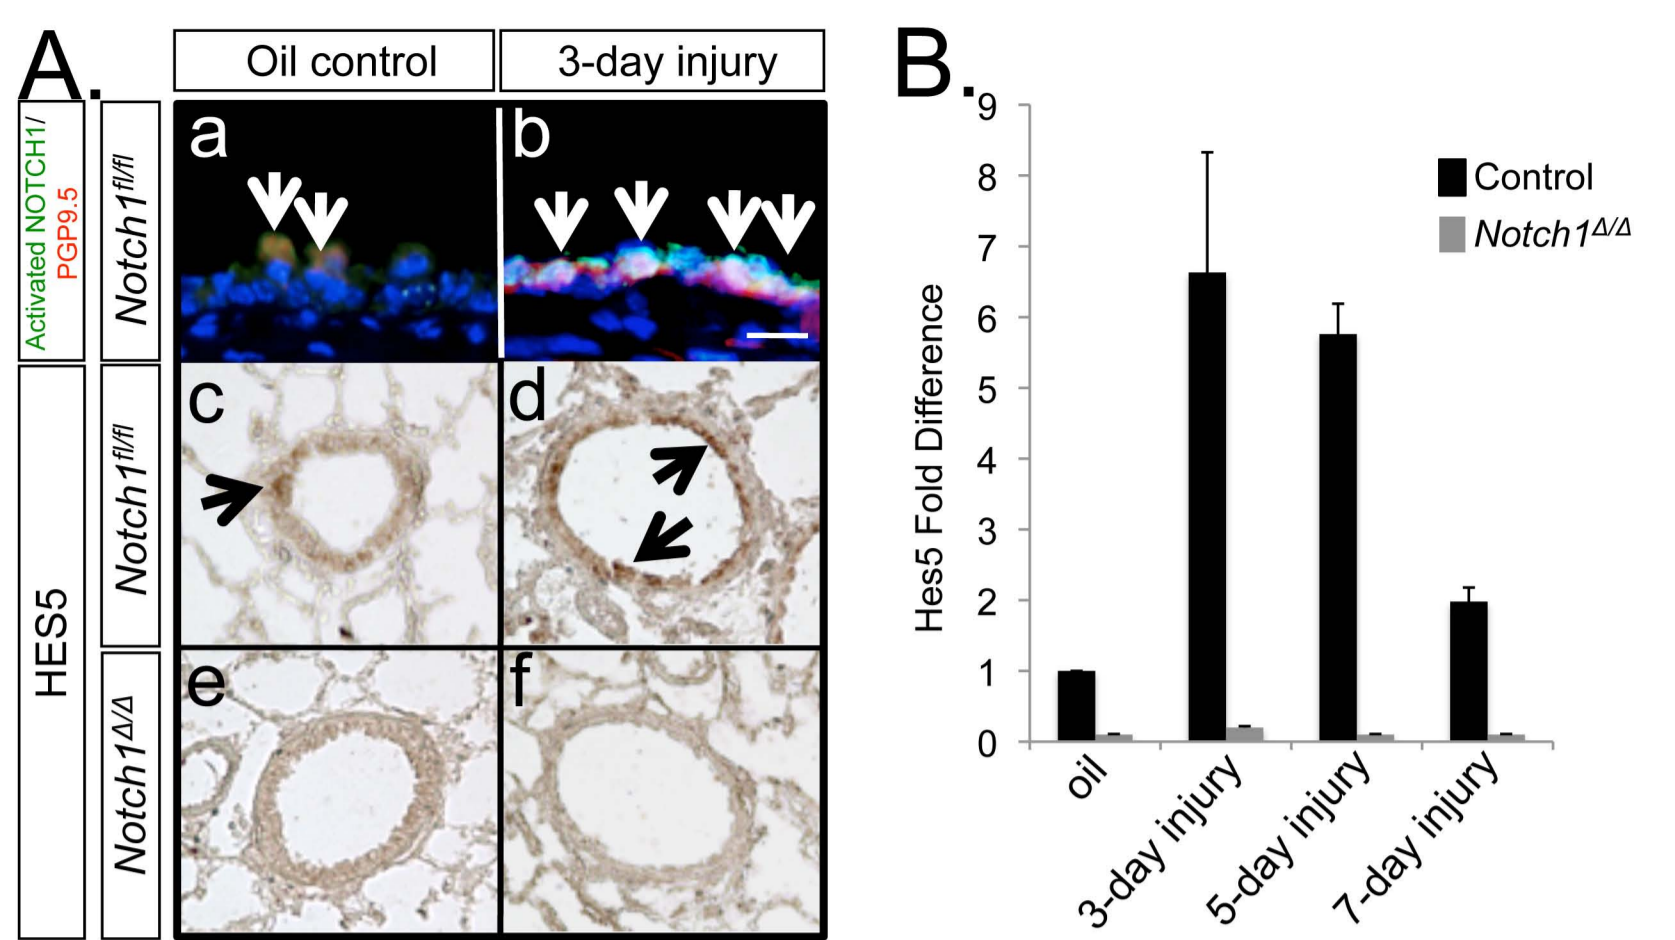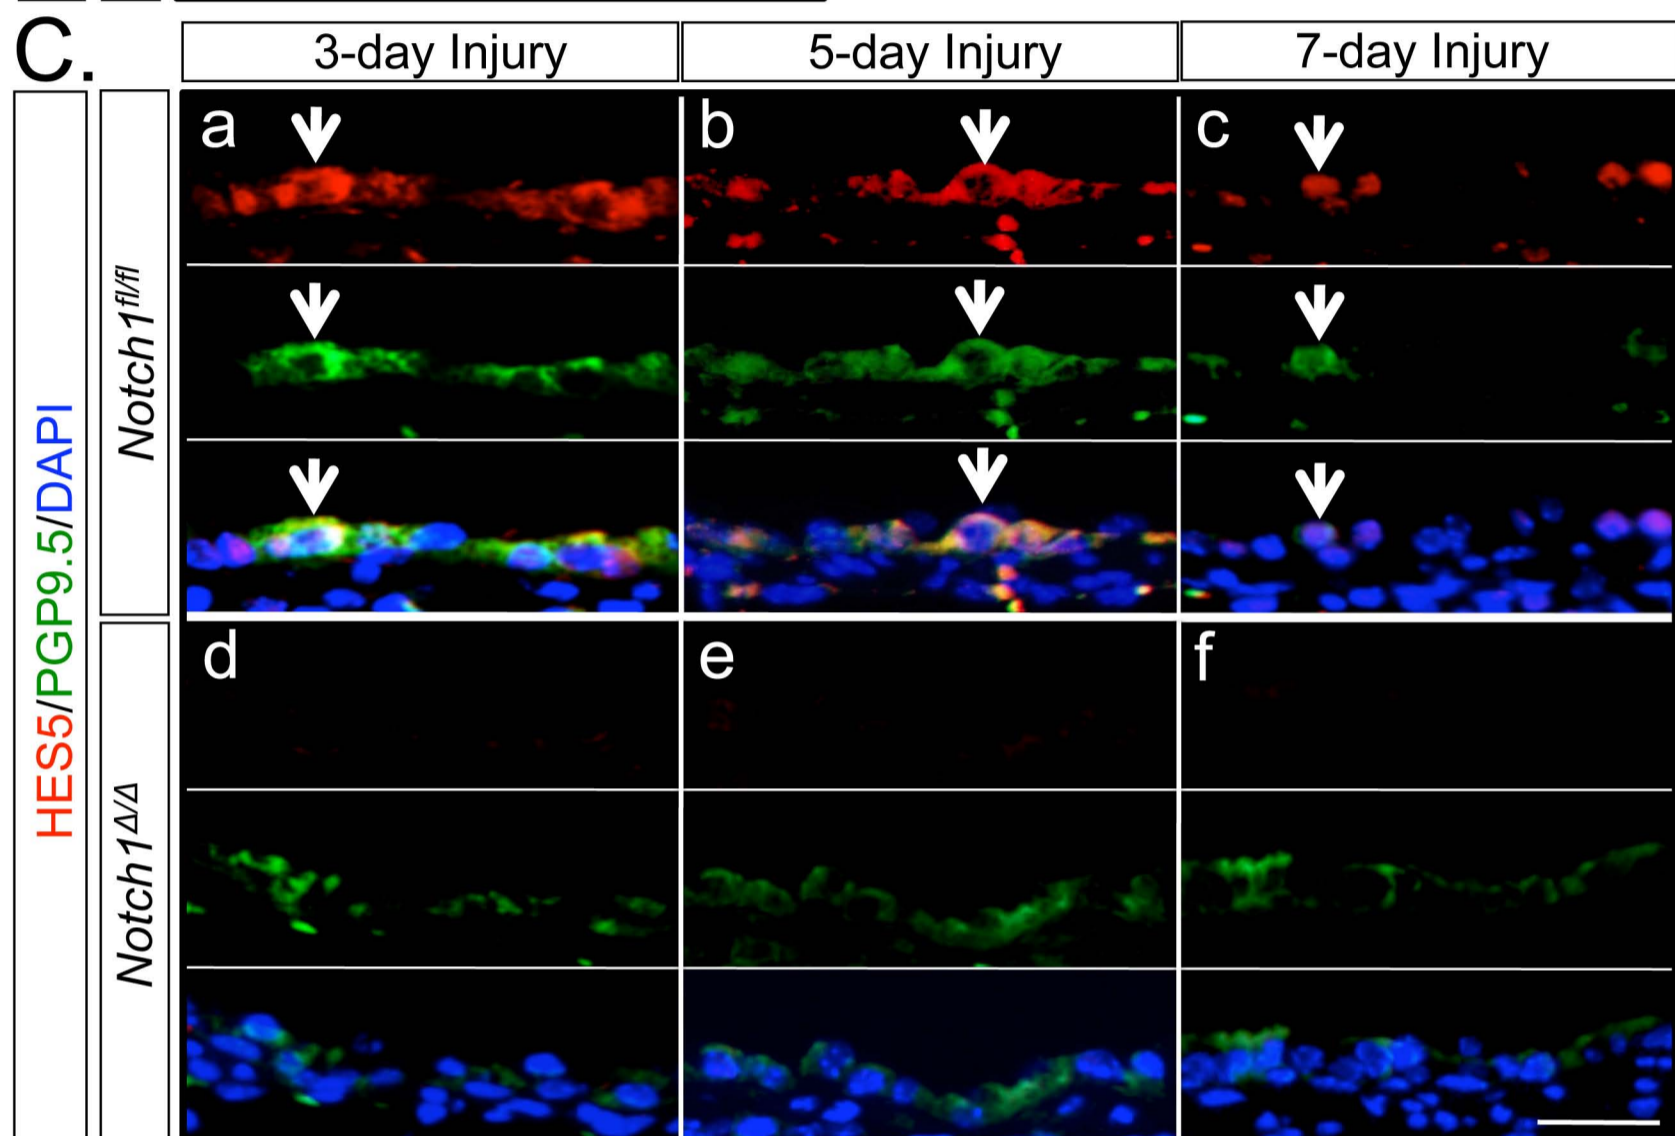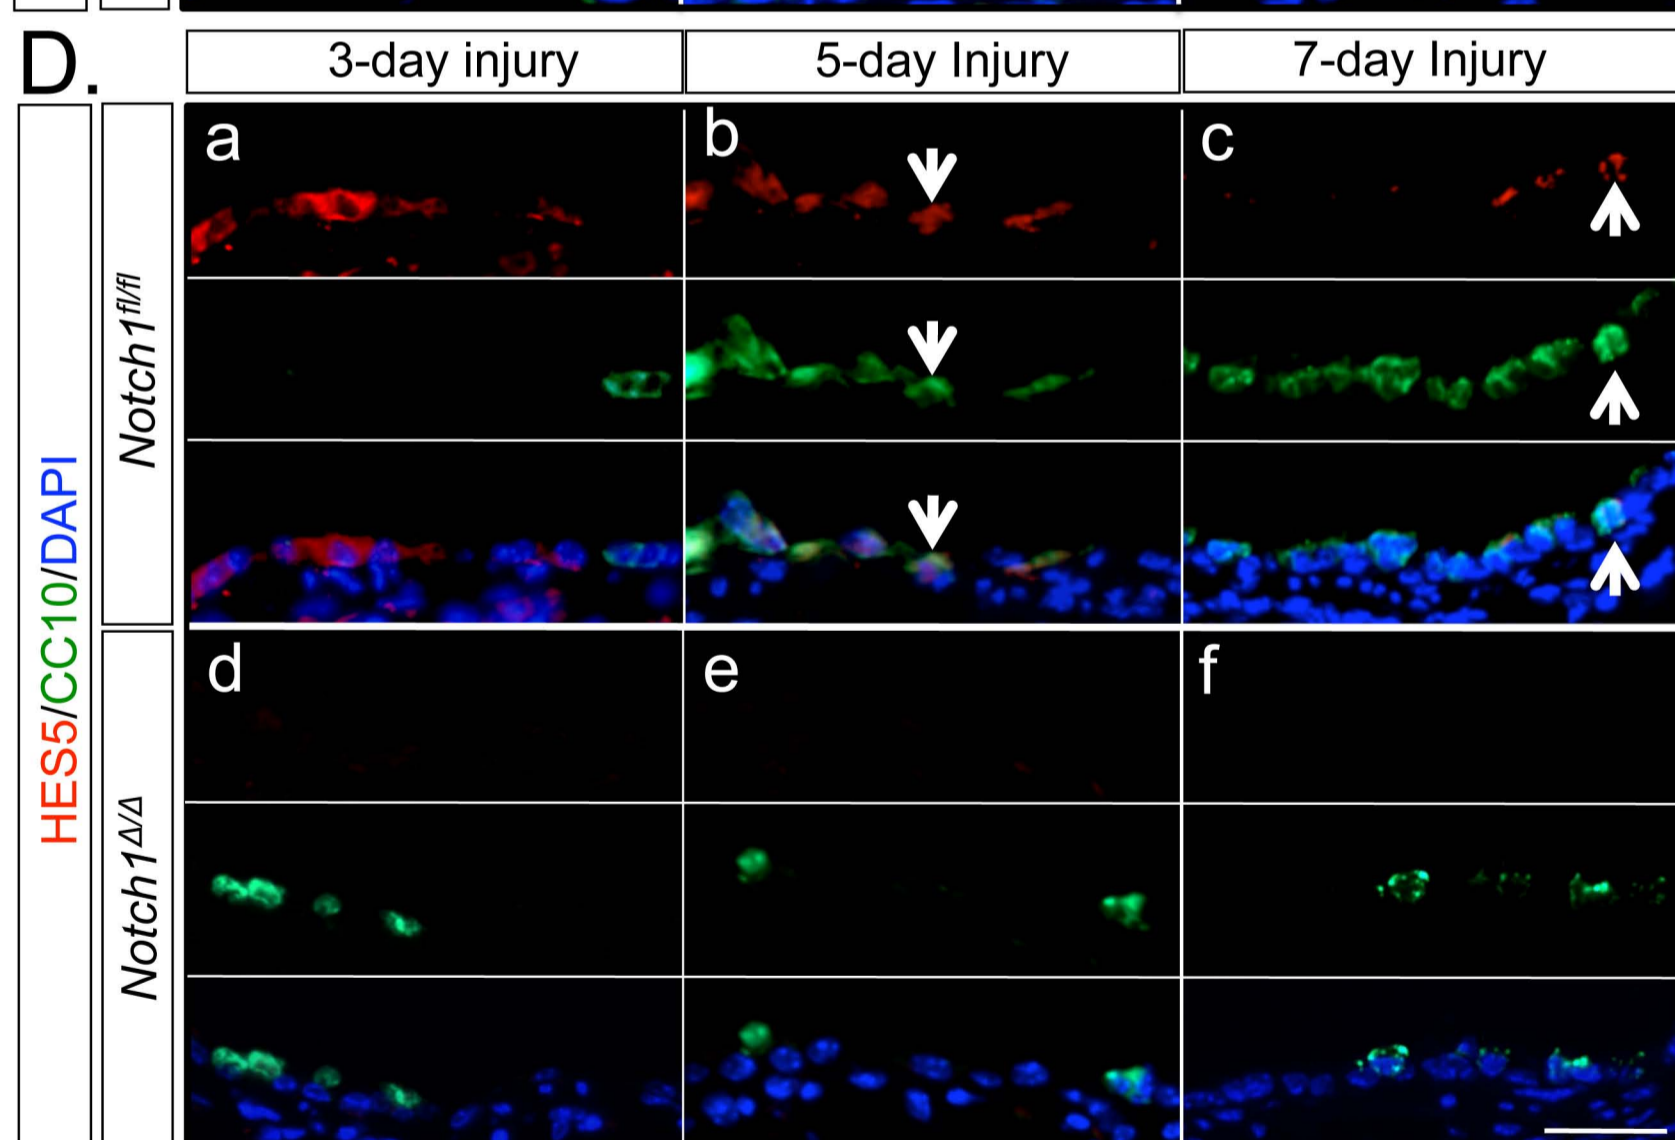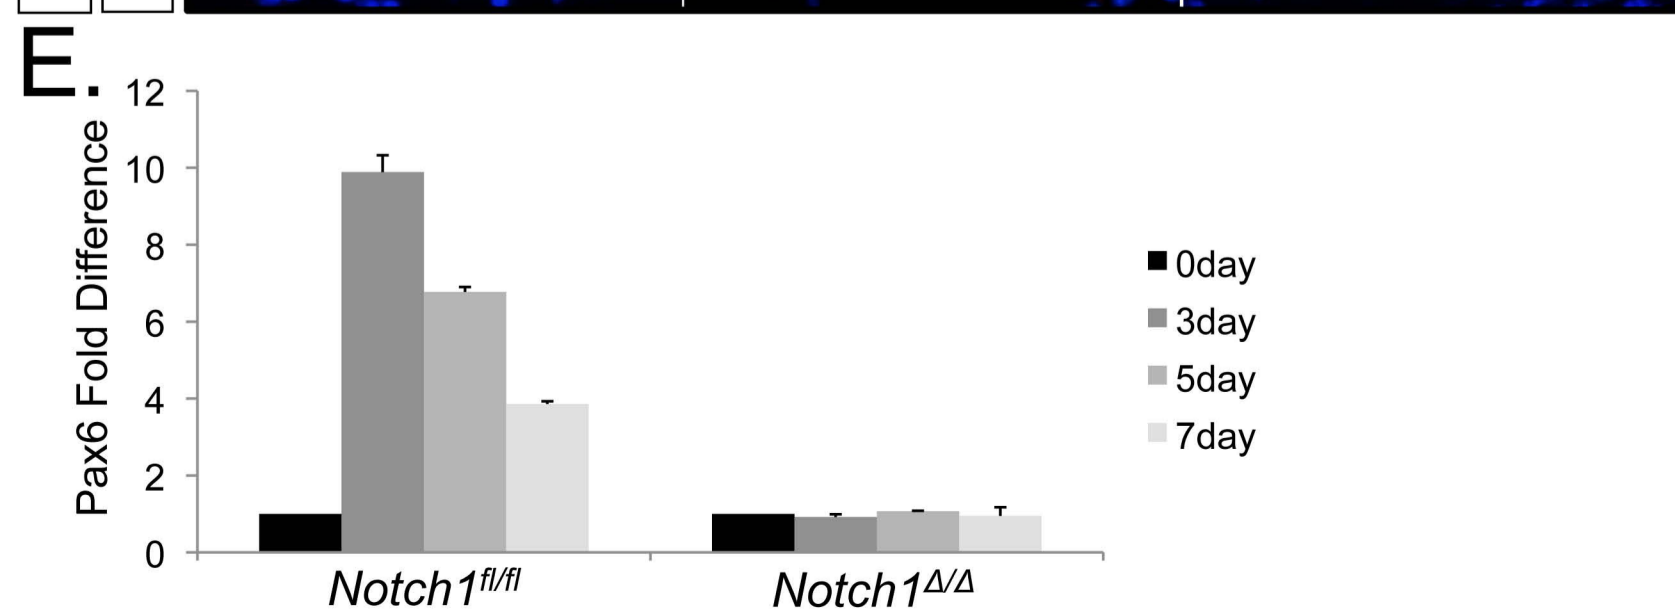

Notch1

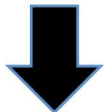

Hes5

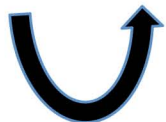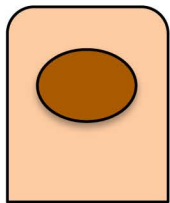

PGP9.5

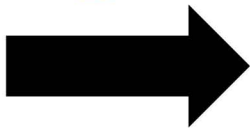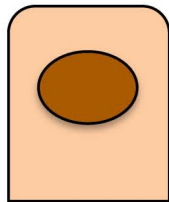

PGP9.5/CC10

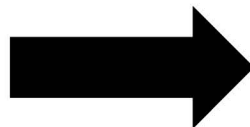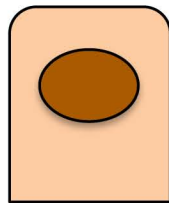

CC10
